# Supplementary material for: The influence of decadal oscillations on the oxygen and nutrienttrends in the Pacific Ocean
Source: Copernicus journal article supplement (doi:10.5194/bg-2019-91), 2019-03-21
Supplement: Supplementary file 1 [file bg-2019-91-supplement.pdf]

1  
2  
3  
4  
5  
6  
7  
8  
9  
10  
11  
12  
13  
14  
15  
16  
17  
18  
19  
20  
21  
22  
23  
24  
25  
26

**Supplementary table**

**Table S1.** Linear trends of solutes in  $\mu\text{mol kg}^{-1} \text{ yr}^{-1}$  with 95% confidence intervals where data are available for the entire period since 1950, for negative (1950-1976; PDO-) and positive (after 1976; PDO+) PDO periods in the 50 to 300 m depth layer for April to December measurements for area P ( $48^{\circ}$ - $52^{\circ}$ N,  $143^{\circ}$ - $147^{\circ}$ W) and Oyashio region ( $39^{\circ}$ - $42^{\circ}$ N,  $144^{\circ}$ - $149^{\circ}$ E).

| Parameter | trend              | time period | PDO- trend         | time period | PDO+ trend         | time period |
|-----------|--------------------|-------------|--------------------|-------------|--------------------|-------------|
| Area      | area P             |             | area P             |             | area P             |             |
| Oxygen    | $-0.22 \pm 0.23$   | 1954-2017   | $-0.16 \pm 1.44$   | 1954-1976   | $-0.22 \pm 0.43$   | 1977-2017   |
| Nitrate   | $+0.069 \pm 0.050$ | 1956-2017   | $-0.114 \pm 0.516$ | 1956-1973   | $+0.069 \pm 0.050$ | 1980-2017   |
| Silicate  | $+0.491 \pm 0.177$ | 1958-2017   | $+2.26 \pm 5.74$   | 1958-1971   | $+0.216 \pm 0.211$ | 1987-2017   |
| Phosphate | $+0.001 \pm 0.003$ | 1954-2017   | $-0.014 \pm 0.025$ | 1954-1971   | $+0.001 \pm 0.007$ | 1980-2017   |
| Area      | Oyashio region     |             | Oyashio region     |             | Oyashio region     |             |
| Oxygen    | $-0.18 \pm 0.32$   | 1952-2017   | $-0.27 \pm 0.56$   | 1952-1976   | $+0.14 \pm 0.72$   | 1977-2017   |
| Nitrate   | $+0.106 \pm 0.043$ | 1964-2017   | $+0.365 \pm 0.566$ | 1964-1976   | $+0.124 \pm 0.060$ | 1977-2017   |
| Silicate  | $+0.156 \pm 0.340$ | 1952-2017   | $-1.40 \pm 1.14$   | 1952-1971   | $+0.614 \pm 0.343$ | 1981-2017   |
| Phosphate | $+0.006 \pm 0.003$ | 1953-2017   | $+0.011 \pm 0.017$ | 1953-1976   | $+0.009 \pm 0.005$ | 1977-2017   |

1  
2  
3  
4  
5

## Supplementary figures

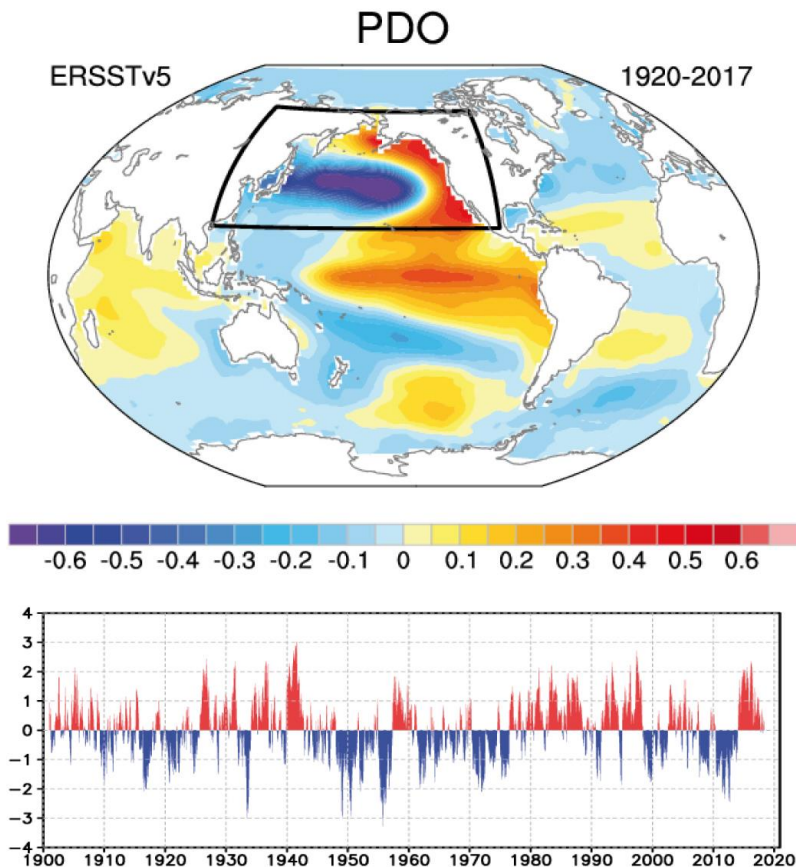

6  
7

8 **Figure S1.** Global expression of the Pacific Decadal Oscillation (PDO, top) obtained by linearly  
9 regressing monthly sea surface temperature (SST) anomalies (in °C) based on ERSSTv5 data set  
10 (Huang et al., 2017) for the period 1920-2017 at each grid box upon the leading Principal  
11 Component (PC) time series based on the domain outlined in the black box (Adapted from Deser et  
12 al., 2010 and modified by A. Phillips). The PDO time series 1900 to 2017, defined by their  
13 corresponding PC is shown in the lower frame. (Figure from Tokyo Climate Center,  
14 [http://ds.data.jma.go.jp/tcc/tcc/products/elnino/decadal/pdo\\_month.html](http://ds.data.jma.go.jp/tcc/tcc/products/elnino/decadal/pdo_month.html)) based on the HadISST data  
15 set (Rayner et al., 2003).

16

1  
2  
3  
4  
5  
6  
7  
8  
9  
10  
11  
12  
13  
14  
15  
16  
17  
18  
19  
20  
21  
22  
23  
24  
25  
26  
27

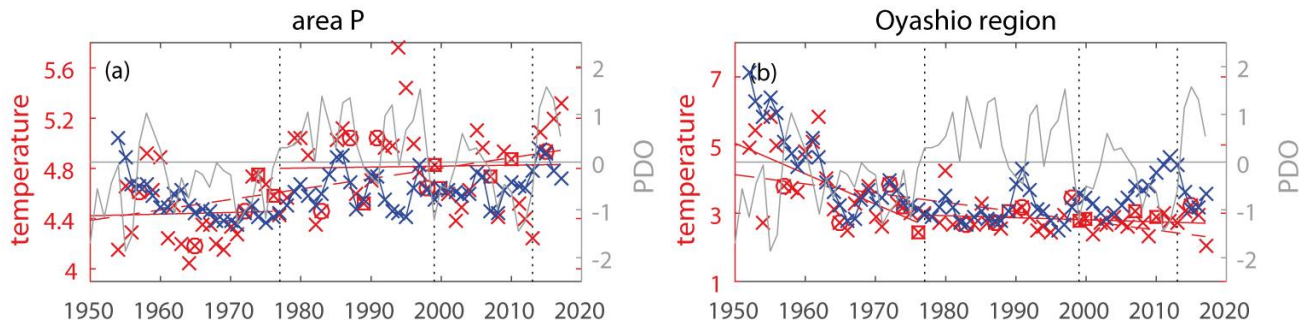

**Figure S2.** Annual mean concentration of temperature in °C for years available and trends for the layer 50 to 300 m plotted for the entire time period (dashed red lines) and for the periods 1950 to 1976 for the negative PDO phase and after 1976 for the positive PDO phase (solid red lines) a) at area P (48° to 52°N, 143° to 147°W) from hydrodata CTD and bottle data and station P data (50°N, 145°W) for the period 1954 to 2017 with a trend of  $0.0083 \pm 0.0073 \text{ } ^\circ\text{C yr}^{-1}$  and b) the Oyashio region between 39° and 42°N, 144° and 149°E for the period 1952 to 2017 with a trend of  $-0.0273 \pm 0.0188 \text{ } ^\circ\text{C yr}^{-1}$ . El Niño years defined as strong are marked by an additional circle, strong La Niña years by an additional square. The change of the PDO status in 1977, 1999 and 2013 are marked by vertical dotted lines. PDO annual time series are shown in the temperature time series as solid grey lines. In addition the annual mean 0 to 50 m temperatures smoothed with a 4-point running mean are included as blue lines covering the temperature range 6.0 to 10.2 °C in area P and 5.3 to 16.4°C in the Oyashio region.

1

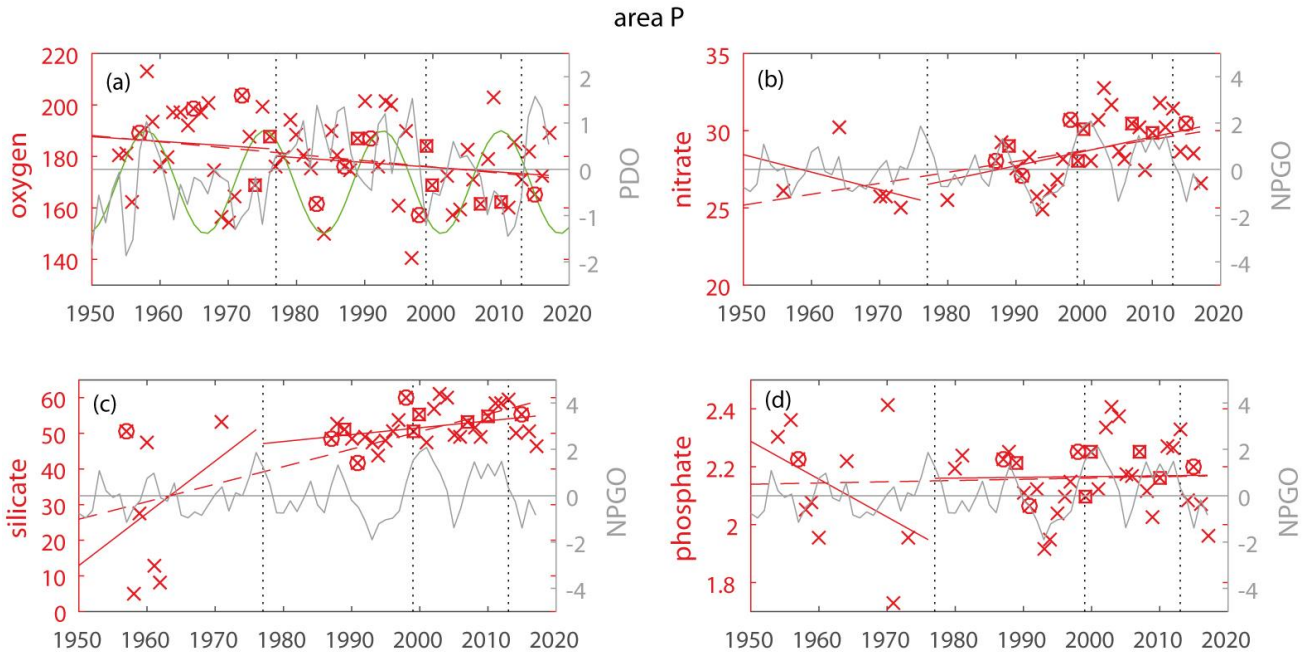

2

3 **Figure S3.** Annual mean concentration for years available and trends for the layer 50 to 300 m  
4 plotted for the entire time period (dashed red lines) and for the periods 1950 to 1976 for the negative  
5 PDO phase and after 1976 for the positive PDO phase (solid red lines) at area P (48° to 52°N, 143° to  
6 147°W) from hydrodata CTD and bottle data and station P data (50°N, 145°W) for the period since  
7 1956 in  $\mu\text{mol kg}^{-1} \text{ yr}^{-1}$  for a) oxygen, b) nitrate, c) silicate and d) phosphate. For oxygen  
8 measurements in 2001 were removed as the 50-300 m mean was much too high ( $379 \mu\text{mol kg}^{-1}$ ). El  
9 Niño years defined as strong are marked by an additional circle, strong La Niña years by an  
10 additional square. The change of the PDO status in 1977, 1999 and 2013 are marked by vertical  
11 dotted lines. The PDO annual mean time series are shown in the oxygen time series and the NPGO  
12 annual mean time series in nitrate, phosphate and silicate time series as solid grey lines. In the  
13 oxygen time series the 18.6 year sinusoidal nodal cycle is included (green curve).

14

15

16

17

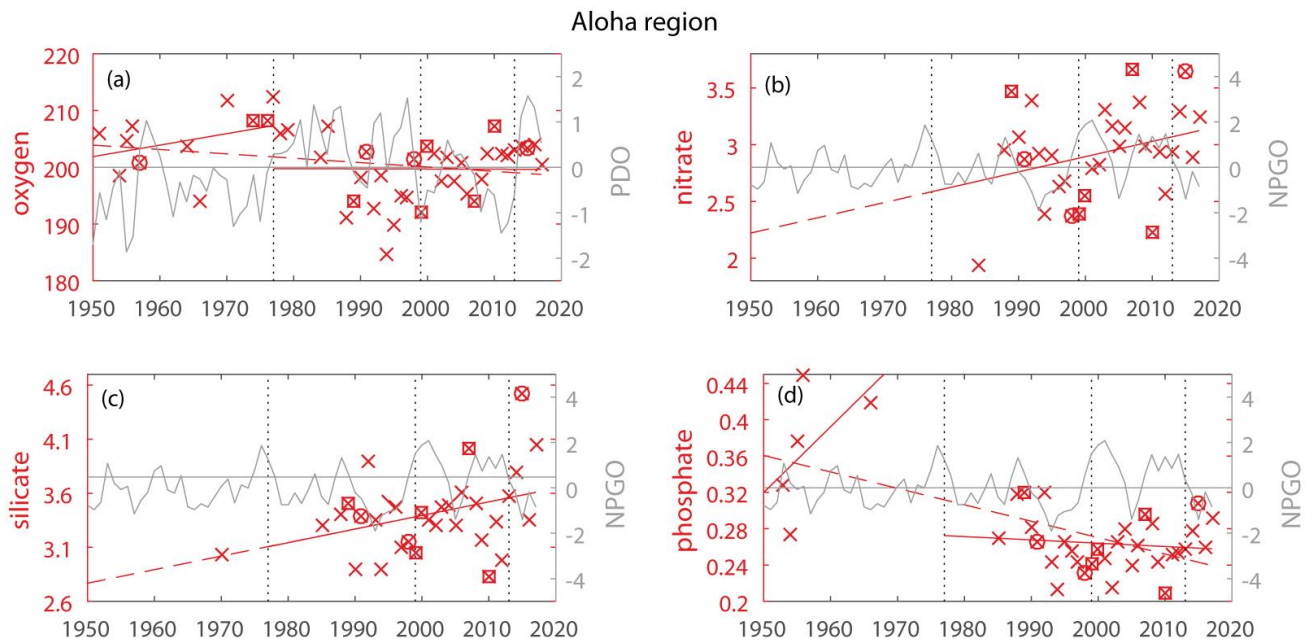

1  
 2 **Figure S4.** Annual mean concentration for years available and trends for the layer 50 to 300 m  
 3 plotted for the entire time period (dashed red lines) and for the periods 1950 to 1976 for the negative  
 4 PDO phase after 1976 for the positive PDO phase (solid red lines) between 22° and 25°N, 156 and  
 5 159°W from hydrodata CTD and bottle data and station Aloha data (22°45'N, 158°W) for the period  
 6 since October 1988 in  $\mu\text{mol kg}^{-1} \text{ yr}^{-1}$  for a) oxygen, b) nitrate, c) silicate and d) phosphate. For  
 7 silicate measurements in 1984 were removed as they were too low ( $1.83 \mu\text{mol kg}^{-1}$ ) phosphate  
 8 measurements in 1951 were removed as the 50-300 m mean was too high ( $0.573 \mu\text{mol kg}^{-1}$ ). El Niño  
 9 years defined as strong are marked by an additional circle, strong La Niña years by an additional  
 10 square. The change of the PDO status in 1977, 1999 and 2013 are marked by vertical dotted lines.  
 11 PDO annual mean time series are shown in the oxygen time series and the NPGO annual mean time  
 12 series in nitrate, phosphate and silicate time series as solid grey lines.

13

14

15

16

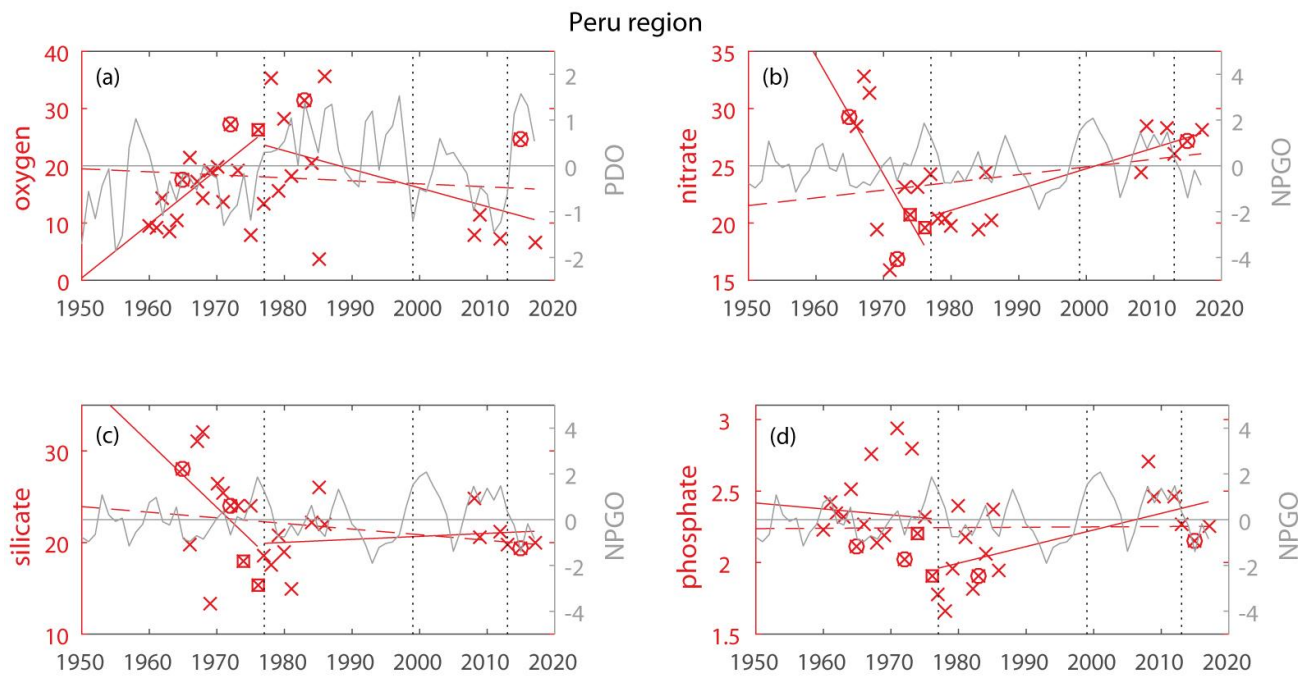

1  
 2 **Figure S5.** Annual mean concentration for years available and trends for the layer 50 to 300 m  
 3 plotted for the entire time period (dashed red lines) and for the periods 1950 to 1976 for the negative  
 4 PDO phase and after 1976 for the positive PDO phase (solid red lines) between 7° and 12°S, 78 and  
 5 83°W from hydrodata CTD and bottle data in  $\mu\text{mol kg}^{-1} \text{yr}^{-1}$  for a) oxygen, b) nitrate, c) silicate and  
 6 d) phosphate. For oxygen measurements in 1982 were removed as they were too high ( $62.4 \mu\text{mol kg}^{-1}$ ).  
 7 El Niño years defined as strong are marked by an additional circle, strong La Niña years by an  
 8 additional square. The change of the PDO status in 1977, 1999 and 2013 are marked by vertical  
 9 dotted lines. PDO annual mean time series are shown in the oxygen time series and the NPGO annual  
 10 mean time series in the nitrate, silicate and phosphate time series as solid grey lines.

11

12

13 Supplementary references:

14 Deser, C., Alexander, M. A., Xie, S.-P., and Phillips, A. S.: Sea surface temperature variability:  
 15 Patterns and mechanisms, *Annu. Rev. Mar. Sci.*, 2, [https://doi.org/10.1146/annurev-marine-120408-](https://doi.org/10.1146/annurev-marine-120408-151453)  
 16 151453, 2010.

17 Huang, B., Thorne, P. W., Banzon, V. F., Boyer, T., Cherupin, G., Lawrimore, J. H., Menne, M. J.,  
 18 Smith, T. M., Vose, R. S., and Zhang, H.-M.: Extended reconstructed sea surface temperature,  
 19 version 5 (ERSSTv5): Upgrades, validations, and intercomparisons, *J. Climate*, 30,  
 20 <https://doi.org/10.1175/JCLI-D-16-0836.1>, 2017.

1 Rayner, N. A., Parker, D. E., Horton, E. B., Folland, C. K., Alexander, L. V., Rowell, D. P., Kent, E.  
2 C., and Kaplan, A.: Global analyses of sea surface temperature, sea ice, and night marine air  
3 temperature since the late nineteenth century, *J. Geophys. Res.* 108 D14, 4407,  
4 <https://doi.org/10.1029/2002JD002670>, 2003.

5
